# Supplementary material for: Biological relevance of oxidative debris present in as-prepared graphene oxide
Source: Royal Society of Chemistry journal article supplement (doi:10.1039/c5ra10306a), 2015-01-01
Supplement: c5ra10306a1.pdf [file c5ra10306a1.pdf]

## Supporting information

### Biological relevance of oxidative debris present in as-prepared graphene oxide

Ajith Pattammattel<sup>a,b,c</sup>, Christina L. Williams<sup>a,b</sup>, Paritosh Pande<sup>a</sup>, William G. Tsui<sup>a</sup>, Ashis K. Basu<sup>a</sup> and Challa Vijaya Kumar<sup>a,b,c\*</sup>

a. Department of Chemistry, b. Department of Molecular and Cell Biology, and

c. the Institute of Material Science, University of Connecticut, 55 North

Eagleville Road, Unit 3060, Storrs, CT 06269-3060

\*Address Correspondence to: [Challa.Kumar@uconn.edu](mailto:Challa.Kumar@uconn.edu)

Table S1. Properties of proteins

| Protein   | Mol. Wt (kDa) | pI   | Net charge (pH 7.0)* | Total number of residues | Number of Arginines | Number of Lysines | PDB ID | Reference |
|-----------|---------------|------|----------------------|--------------------------|---------------------|-------------------|--------|-----------|
| Pepsin A  | 40            | 1    | -40                  | 326                      | 2                   | 1                 | 3PEP   | 1         |
| GOx       | 85            | 4.6  | -27                  | 583                      | 22                  | 15                | 1GAL   | 2         |
| HSA       | 66            | 4.7  | -15                  | 585                      | 24                  | 59                | 4L9K   | 3         |
| Ovalbumin | 45            | 4.9  | -12                  | 386                      | 15                  | 20                | 1OVA   | 4         |
| BLG       | 18            | 5.1  | -18                  | 162                      | 3                   | 15                | 1BEB   | 5         |
| Catalase  | 64            | 5.4  | -5                   | 527                      | 32                  | 28                | 3NWL   | 6         |
| BSA       | 66            | 5.5  | -17                  | 583                      | 23                  | 59                | 3V03   | 7         |
| Hb        | 64            | 6.8  | 1                    | 572                      | 14                  | 48                | 2QSS   | 8         |
| Mb        | 17            | 6.8  | 0                    | 153                      | 2                   | 19                | 3WI8   | 9         |
| RNase A   | 14            | 9.3  | 4                    | 124                      | 4                   | 10                | 4POU   | 10        |
| Trypsin   | 24            | 9.3  | 7                    | 281                      | 2                   | 14                | 1TPA   | 11        |
| Cyt c     | 12            | 10   | 13                   | 104                      | 2                   | 16                | 3CYT   | 12        |
| Lyz       | 15            | 11.3 | 8                    | 129                      | 11                  | 6                 | 1LYZ   | 13        |

\*Theoretical – from known sequence.

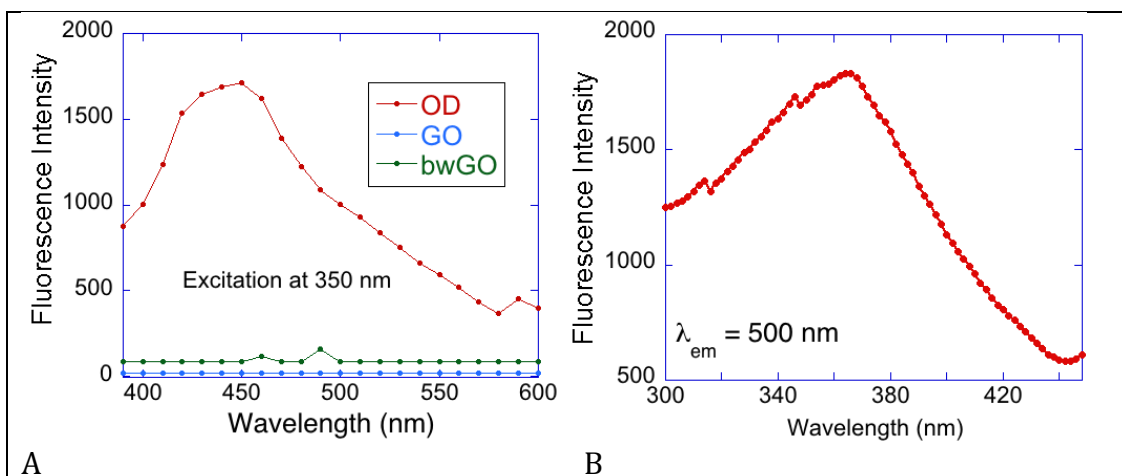

Figure S1. A. Fluorescence spectra of OD (50  $\mu\text{g/mL}$ ), GO (150  $\mu\text{g/mL}$ ) and bwGO (150  $\mu\text{g/mL}$ ) in 10 mM sodium phosphate buffer at pH 7.0. OD shows a characteristic peak at 450 nm (excitation at 350 nm) whereas GO and bwGO showed no noticeable peaks at the same region, proves the separation step. B. Excitation spectra of OD (200  $\mu\text{g/mL}$ ) show emission maxima around 350 nm, with emission monitored at 500 nm.

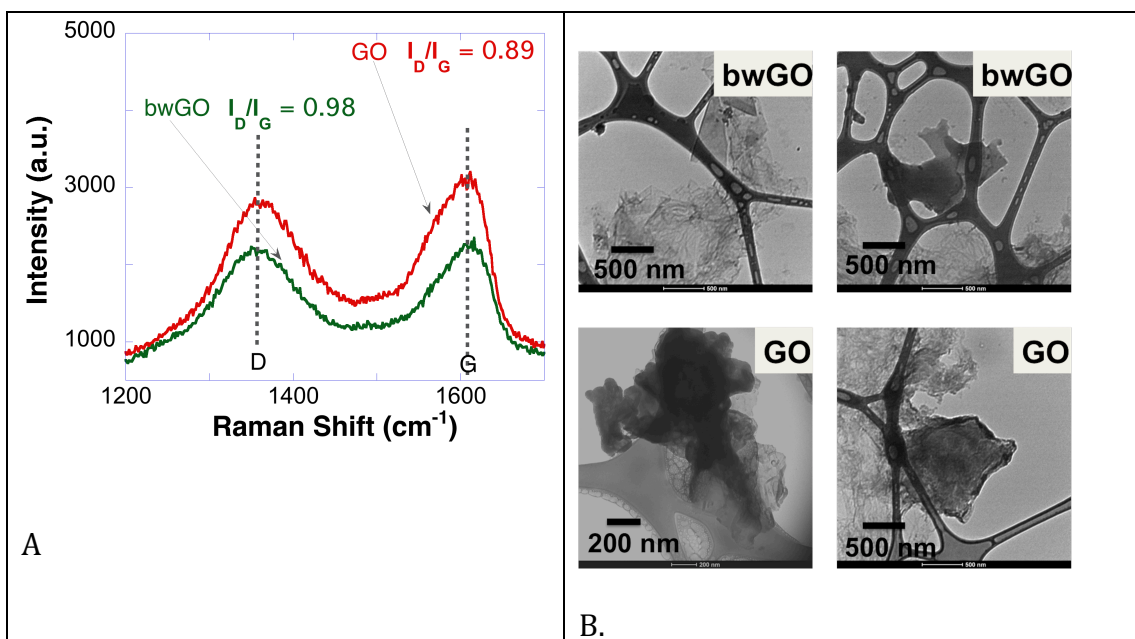

Figure S2. A. Raman spectra of GO and bwGO shows no significant change in position or intensity of D and G bands This proves that no additional defects were introduced to the graphitic plane by base wash. B. TEM images of GO and bwGO show similar morphology.

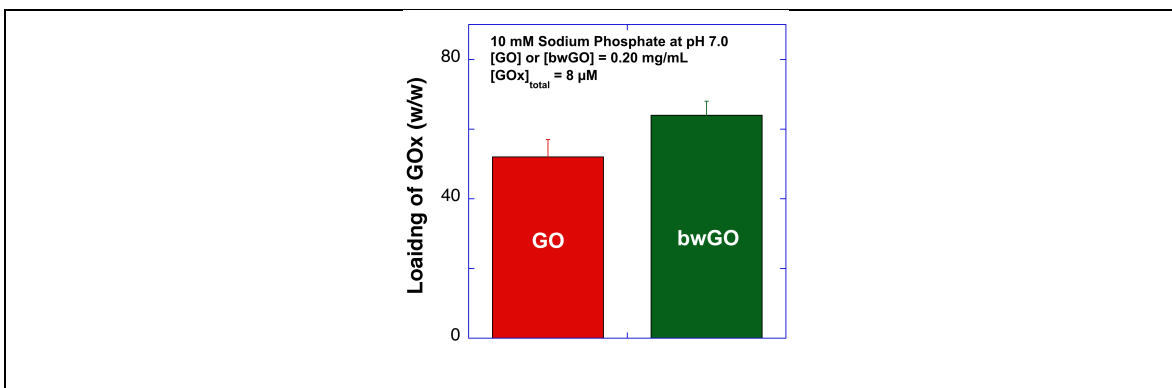

Figure S3. Loading efficiency (%) of GOx/bwGO (red) and GOx/bwGO (green) shows increased binding of GOx to bwGO.

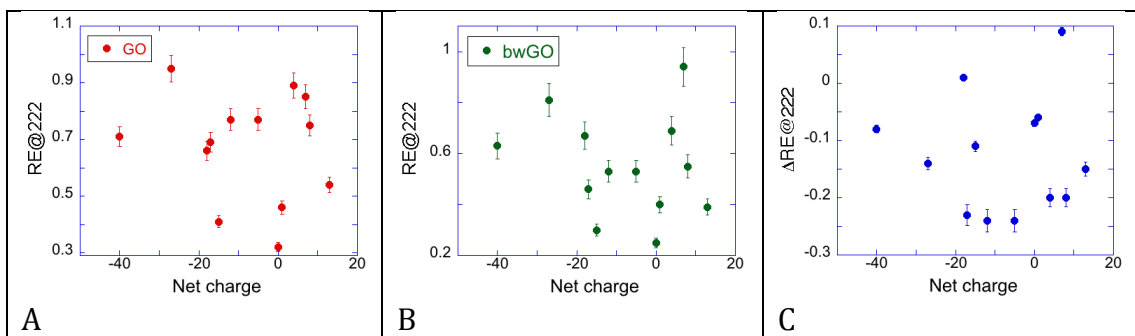

Figure S4. Net charge of the protein at pH 7.0 is not correlated with relative loss of ellipticity at 222 nm (RE@222), after binding to GO (A) and bwGO (B). The differences in ellipticity retention of bwGO to GO ( $\Delta$ RE@222) is shown in C. No noticeable trend is shown in all cases which indicates that the role of charge in structure retention of proteins is negligible.

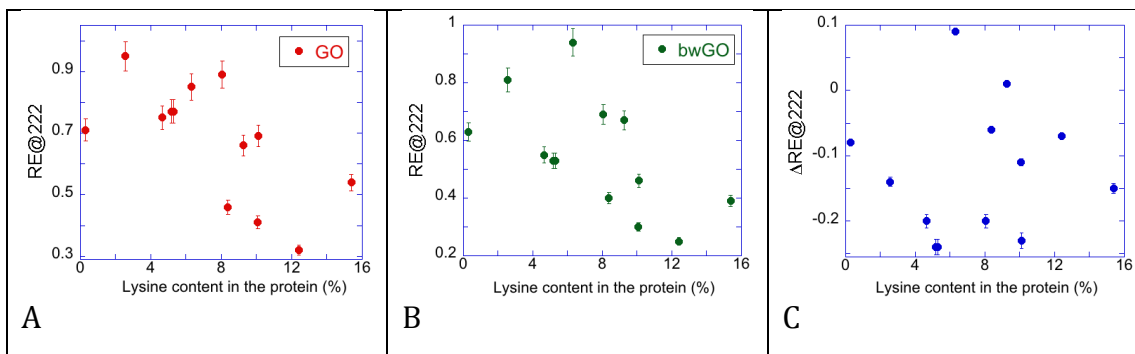

Figure S5. Plots of lysine content in the protein (%) vs the extent of structure retention observed after binding to GO (A) and bwGO (B). (C) The difference in the extents of structure retention ( $\Delta$ RE@222) as a function of lysines. Lack of correlation in each case was noted.

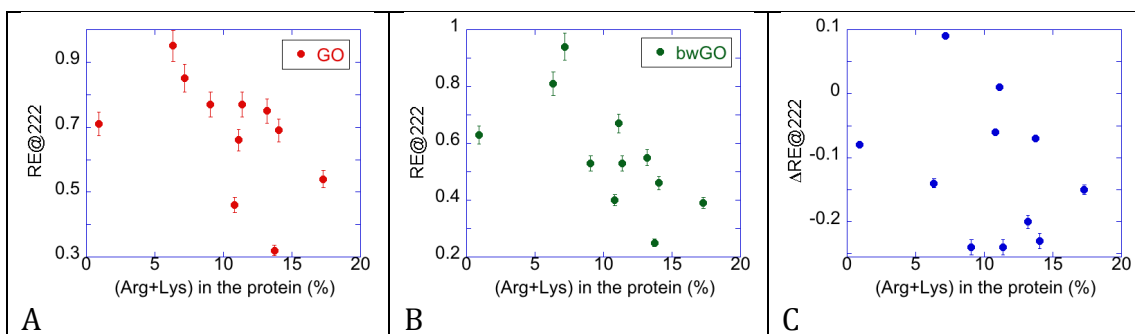

Figure S6. Plots of the sum of the number of Lysine and arginine residues in the protein as a function of the extent of structure retention after binding to GO (A) and bwGO (B). (C) The difference in the extents of structure retention ( $\Delta RE@222$ ) for bwGO/protein minus GO/protein as a function of total number of arginines and lysines combined, and the absence of any correlation is demonstrated.

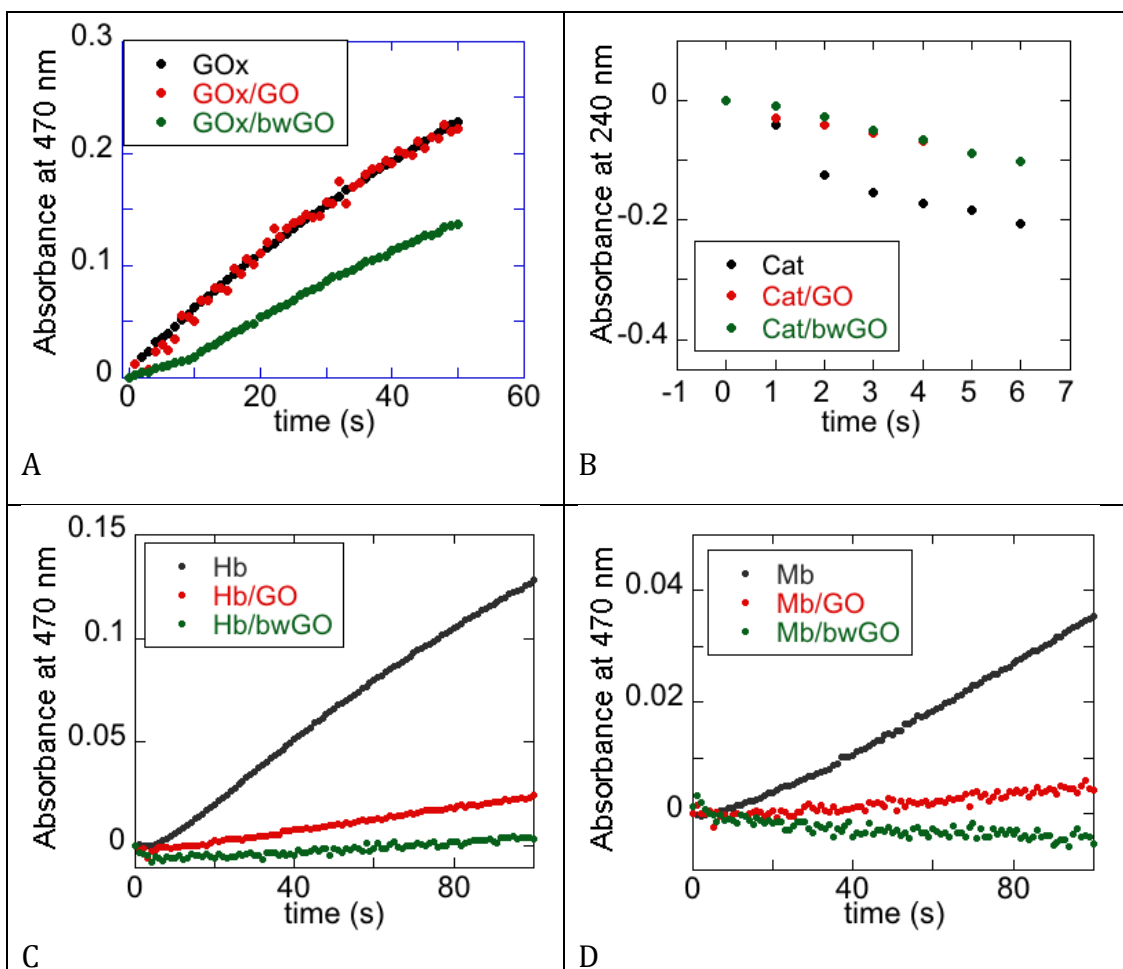

Figure S7. Activity traces of oxidase activity of GOx (A), peroxide reduction activity of Cat (B) and peroxidase like activities of Hb (C) and Mb (D) is shown. The specific activities of free enzymes (black lines), GO conjugates (red dots) and

bwGO conjugates (green dots) were determined from the slope of the lines.  
Average of three independent measurements is plotted here.

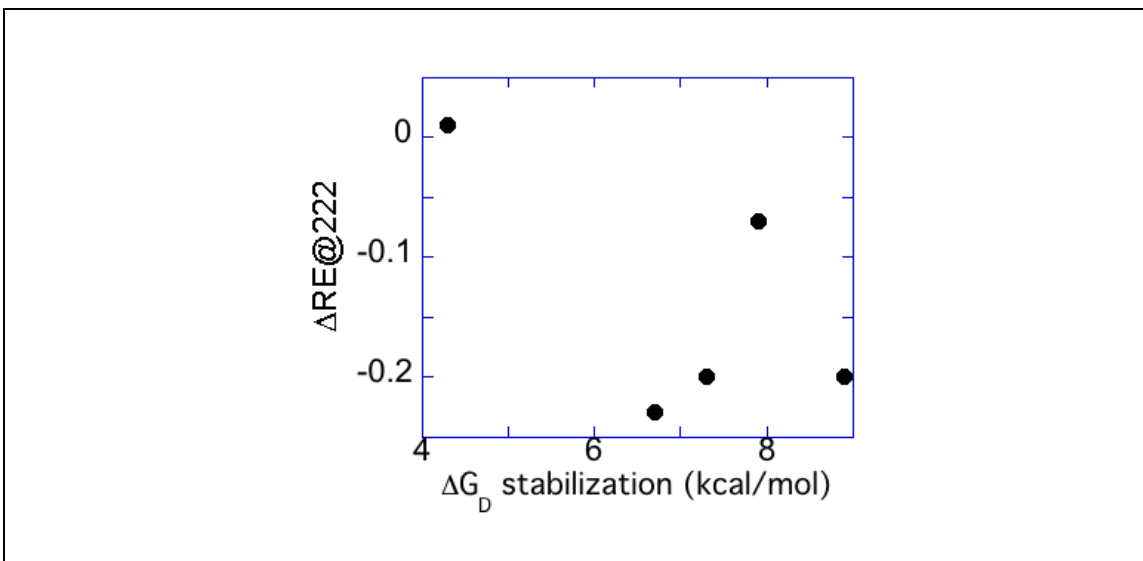

Figure S8. Free energy of denaturation of BLG, BSA, RNase A, Mb, and Lyz<sup>14</sup> (from left to right points in the plot) plotted against  $\Delta RE@222$ , shows no correlation.

Table S2. Statistical analysis of cytotoxicity data using two-tailed, unpaired student *t* test.

| Conc. Of GO/bwGO ( $\mu\text{g/mL}$ ) | $\rho$ value | Significant ( $\rho < 0.05$ ) |
|---------------------------------------|--------------|-------------------------------|
| 10                                    | 0.5381       | No                            |
| 25                                    | 0.5360       | No                            |
| 50                                    | 0.8710       | No                            |
| 75                                    | 0.4452       | No                            |
| 100                                   | 0.0429       | <b>Yes</b>                    |
| 250                                   | 0.0176       | <b>Yes</b>                    |
| 500                                   | 0.0237       | <b>Yes</b>                    |

- 
1. A. R. Sielecki, A. A. Fedorov, A. Boodhoo, N. S. Andreeva and M. N. G. James, *J. Mol. Biol.*, **1990**, 214, 143-170.
  2. H. J. Hecht, H. M. Kalisz, J. Hendle, R. D. Schmid and D. Schomburg, *J. Mol. Biol.*, **1993**, 229, 153-172.
  3. Z.-m. Wang, J. X. Ho, J. R. Ruble, J. Rose, F. Rüker, M. Ellenburg, R. Murphy, J. Click, E. Soistman, L. Wilkerson and D. C. Carter, *Biochimica et Biophysica Acta (BBA) - General Subjects*, **2013**, 1830, 5356-5374.
  4. P. E. Stein, A. G. W. Leslie, J. T. Finch and R. W. Carrell, *J. Mol. Biol.*, **1991**, 221, 941-959.
  5. S. Brownlow, J. H. M. Cabral, R. Cooper, D. R. Flower, S. J. Yewdall, I. Polikarpov, A. C. T. North and L. Sawyer, *Structure*, **1997**, 5, 481-495.
  6. L. M. Foroughi, Y.-N. Kang and A. J. Matzger, *Crystal Growth & Design*, **2011**, 11, 1294-1298.
  7. K. A. Majorek, P. J. Porebski, A. Dayal, M. D. Zimmerman, K. Jablonska, A. J. Stewart, M. Chruszcz and W. Minor, *Molecular Immunology*, **2012**, 52, 174-182.
  8. R. Aranda, H. Cai, C. E. Worley, E. J. Levin, R. Li, J. S. Olson, G. N. Phillips and M. P. Richards, *Proteins: Structure, Function, and Bioinformatics*, **2009**, 75, 217-230.
  9. K. Oohora, Y. Kihira, E. Mizohata, T. Inoue and T. Hayashi, *J. Am. Chem. Soc.*, **2013**, 135, 17282-17285.
  10. S. W. Fanning, R. Walter and J. R. Horn, *Protein Engineering Design and Selection*, **2014**, 27, 391-397.
  11. M. Marquart, J. Walter, J. Deisenhofer, W. Bode and R. Huber, *Acta Crystallographica Section B*, **1983**, 39, 480-490.
  12. G. W. Bushnell, G. V. Louie and G. D. Brayer, *J. Mol. Biol.*, 1990, 214, 585-595.
  13. R. Diamond, *J. Mol. Biol.*, **1974**, 82, 371-391.
  14. F. Ahmad and C. C. Bigelow, *Journal of Biological Chemistry*, 1982, 257, 12935-12938.
